# Supplementary material for: Expression of hormone receptors predicts survival and platinum sensitivity of high-grade serous ovarian cancer
Source: Oxford University Press journal article supplement (doi:10.1042/bsr20210478), 2021-04-23
Supplement: bsr-2021-0478_supp.pdf [file bsr-2021-0478_supp.pdf]

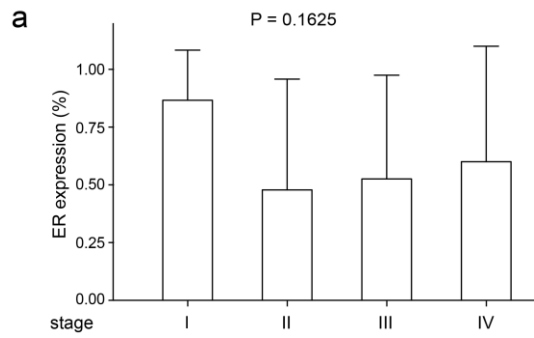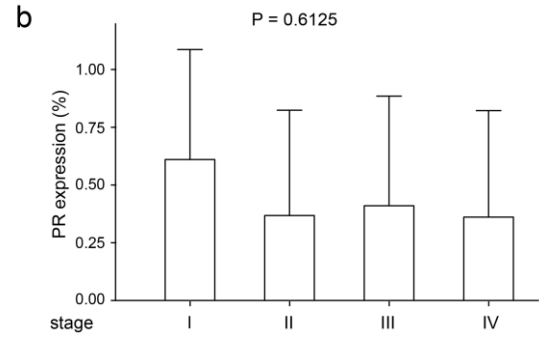

**Supplementary Figure s1. Comparison of ER and PR expression among different tumor stages in TJ-cohort.** (a) ER expression was compared among different tumor stages in TJ-cohort (one-way ANOVA). (b) PR expression was compared among different tumor stages in TJ-cohort (one-way ANOVA).
